## 1 **Anti-Neuraminidase Antibodies Reduce the Susceptibility to and Infectivity of Influenza** 2 **A/H3N2 Virus**

3 Gregory Hoy<sup>1</sup>, Thomas Cortier<sup>2,3</sup>, Hannah E. Maier<sup>1</sup>, Guillermina Kuan<sup>4,5</sup>, Roger Lopez<sup>4,6</sup>, Nery  
4 Sanchez<sup>4</sup>, Sergio Ojeda<sup>4</sup>, Miguel Plazaola<sup>4</sup>, Daniel Stadlbauer<sup>7</sup>, Abigail Shotwell<sup>1</sup>, Angel  
5 Balmaseda<sup>4,6</sup>, Florian Krammer<sup>7,8,9,10</sup>, Simon Cauchemez<sup>2\*</sup>, and Aubree Gordon<sup>1\*</sup>

6 <sup>1</sup>School of Public Health, University of Michigan, Ann Arbor, Michigan, USA; <sup>2</sup>Mathematical Modelling of Infectious  
7 Diseases Unit, Institut Pasteur, Université Paris Cité, UMR 2000 CNRS, Paris, France; <sup>3</sup>Collège Doctoral, Sorbonne  
8 Université, Paris, France; <sup>4</sup>Sustainable Sciences Institute, Managua, Nicaragua; <sup>5</sup>Centro de Salud Sócrates Flores  
9 Vivas, Ministry of Health, Managua, Nicaragua; <sup>6</sup>Laboratorio Nacional de Virología, Centro Nacional de Diagnóstico y  
10 Referencia, Ministry of Health, Managua, Nicaragua <sup>7</sup>Department of Microbiology, Icahn School of Medicine at Mount  
11 Sinai, New York, New York, USA <sup>8</sup>Center for Vaccine Research and Pandemic Preparedness (C-VaRPP), Icahn  
12 School of Medicine at Mount Sinai, New York, NY, USA. <sup>9</sup>Department of Pathology, Molecular and Cell-Based  
13 Medicine, Icahn School of Medicine at Mount Sinai, New York, NY, USA. <sup>10</sup>Ignaz Semmelweis Institute,  
14 Interuniversity Institute for Infection Research, Medical University of Vienna, Vienna, Austria  
15 \*Denotes co-senior authors  
16

### 17 **Abstract**

18 Immune responses against neuraminidase (NA) are of great interest for developing more  
19 robust influenza vaccines, but the role of anti-NA antibodies on influenza infectivity has not been  
20 established. We conducted household transmission studies in Managua, Nicaragua to examine  
21 the impact of anti-NA antibodies on influenza A/H3N2 susceptibility and infectivity. Analyzing  
22 these data with mathematical models capturing household transmission dynamics and their  
23 drivers, we estimated that having higher preexisting antibody levels against the hemagglutinin  
24 (HA) head, HA stalk, and NA was associated with reduced susceptibility to infection (relative  
25 susceptibility 0.67, 95% Credible Interval [CrI] 0.50-0.92 for HA head; 0.59, 95% CrI 0.42-0.82  
26 for HA stalk; and 0.56, 95% CrI 0.40-0.77 for NA). Only anti-NA antibodies were associated with  
27 reduced infectivity (relative infectivity 0.36, 95% CrI 0.23-0.55). These benefits from anti-NA  
28 immunity were observed even among individuals with preexisting anti-HA immunity. These  
29 results suggest that influenza vaccines designed to elicit NA immunity in addition to  
30 hemagglutinin immunity may not only contribute to protection against infection but reduce  
31 infectivity of vaccinated individuals upon infection.

32  
33  
34  
35  
36  
37  
38  
39  
40  
41

## 42 Introduction

43 Influenza virus infection remains an important cause of human disease burden,  
44 with upwards of one billion infections and up to 650,000 deaths occurring globally every  
45 year from disease caused by the influenza virus<sup>1</sup>. Vaccination against influenza virus is  
46 one of the most effective approaches for reducing the overall morbidity and mortality of  
47 seasonal influenza in communities, and improving the effectiveness of influenza  
48 vaccines is an important goal<sup>2-5</sup>. There are two important components of transmission;  
49 *susceptibility* refers to an individual or group's propensity to become infected with  
50 influenza, assuming adequate exposure. *Infectivity* refers to an individual or group's  
51 propensity to infect others, assuming that they themselves are infected. Conditional on  
52 the first person already being infected, the overall risk of transmission from one person  
53 to another depends on the infectivity of the first person and the susceptibility of the  
54 second. Much of the effort for influenza vaccine improvement has focused on the  
55 induction of immune responses that reduce susceptibility to infection or disease, to  
56 moderate effectiveness; much less attention has been given to the development of  
57 vaccines that reduce individual-level infectivity among the vaccinated; in other words,  
58 vaccines that generate an immune response that decreases the infectivity of vaccinees,  
59 even if they are not fully protected from infection<sup>3,4,6-8</sup>. Population-level vaccination  
60 efforts clearly reduce overall community transmission, likely because vaccinated  
61 individuals show reduced susceptibility to infection, which breaks transmission chains<sup>9-</sup>  
62 <sup>11</sup>. However, there is no evidence that current-generation influenza vaccines reduce  
63 individual-level infectivity directly, and little is known about if and how immune  
64 responses that protect against influenza virus infection affect individual infectivity. The  
65 identification of immune responses that both reduce susceptibility to infection and

66 reduce infectivity among vaccinated individuals who are infected would allow for the  
67 development of influenza vaccinations that lower overall influenza circulation in  
68 communities and that provide additional indirect protection to individuals who are  
69 unvaccinated or under vaccinated for influenza, including infants and  
70 immunocompromised individuals.

71       Antibody responses against neuraminidase (NA), an influenza surface  
72 glycoprotein, are thought to protect against severe disease caused by the influenza  
73 virus, and high pre-infection anti-NA antibody levels have been shown to reduce the  
74 overall duration of influenza viral shedding<sup>12-19</sup>. Additionally, studies in animal models  
75 have demonstrated a reduction in viral shedding occurring in animals immunized  
76 against neuraminidase<sup>20,21</sup>. However, viral shedding does not always consistently  
77 correlate with infectivity, and direct transmission reduction of anti-NA immunity has not  
78 been demonstrated in human populations<sup>22</sup>. Additionally, the role of the anti-NA  
79 response on infectivity, relative to other important immune targets such as  
80 hemagglutinin, has not been investigated. This study aims to explore the impact of pre-  
81 existing antibody levels against the hemagglutinin (HA) head, HA stalk, and NA on  
82 influenza virus A/H3N2 transmission in a household setting, with particular interest in  
83 the role of anti-neuraminidase responses in modulating transmission risk.

84

## 85 **Results**

### 86 **Participant and household characteristics**

87       Over three influenza seasons (2014, 2016, 2017), a total of 171 households (171  
88 index cases and their 664 households contacts) were recruited following the detection  
89 of an infected individual (i.e. the index case) and followed up for an average duration of

90 36.7 days. 148 out of 664 (22.3%) household contacts were infected during the follow-  
91 up period. Households were enrolled through identification of an index case at the study  
92 clinic (2014, 2016), or pre-enrolled households were activated after detection of  
93 influenza virus via polymerase chain reaction (PCR) in a member of an enrolled  
94 household (2017). Once activated, index cases and household contacts were tested for  
95 influenza virus every 2-3 days using PCR, and serology was done on blood samples  
96 collected on the first day of household activation (the initial/acute sample) and 30-45  
97 days after household activation (the final/convalescent sample). More information about  
98 the study design and case ascertainment is available in the Online Methods. The  
99 number of infections per household ranged from 1 to 10, with an average of 1.87 total  
100 infections and 0.87 secondary infections per household. The serial interval (i.e. the  
101 average time between index case onset and onset of cases in household contacts) was  
102 3.4 days (SD 2.8 days). A visualization of the intensive monitoring periods by household  
103 is presented in Figure 1.

104       Less than 10% of individuals had ever been vaccinated against influenza, and  
105 only two individuals had been vaccinated for influenza in the 6 months prior to the start  
106 of the monitoring period. Positive individuals were younger. Overall, a higher proportion  
107 of infected individuals had anti-HA head, HA stalk, and NA pre-existing antibody levels  
108 in the lower quartiles when compared to uninfected individuals (Table 1). There was no  
109 difference in the pre-existing antibody levels between index cases and secondary cases  
110 for hemagglutination inhibition assay titers (HAI) and HA stalk antibody levels; however,  
111 index cases had slightly lower anti-NA antibody levels when compared to secondary  
112 cases (median AUC 29.7 and 45.4, respectively,  $p = 0.042$ ) (Figure 2a). The secondary

113 attack rate in households with an index case with low-to-undetectable anti-NA  
114 antibodies was 23.4%, compared to 17.1% in households with an index case with  
115 higher anti-NA antibodies ( $p=0.15$ ); there was no difference in secondary attack rates in  
116 households by index case anti-HA head or anti-HA stalk antibodies (Figure 2b).

### 117 **Effect of pre-existing antibody levels on susceptibility and infectivity**

118 A mathematical model, calibrated to the data with Bayesian data augmentation  
119 methods, was used to reconstruct the unobserved chains of transmission accounting for  
120 the possibility of community (i.e. household member infected outside the household)  
121 and tertiary (i.e. household member infected by another household member who is not  
122 the index case) infections, estimate household transmission rates and determine factors  
123 affecting individual relative susceptibility and infectivity (see Online Methods)<sup>23</sup>.

124 Compared to adults 15+ years of age, children aged 0-14 years had higher relative  
125 susceptibility (relative susceptibility 1.63, 95% CrI 1.22-2.18). High initial antibody levels  
126 against the HA head (0.67, 95% CrI 0.50-0.92), HA stalk (0.59, 95% CrI 0.42-0.82), and  
127 NA (0.56, 95% CrI 0.40-0.77) were associated with reduced susceptibility to influenza  
128 A/H3N2 virus infection (Figure 3a). In infected A/H3N2 individuals, high initial antibody  
129 levels against NA were associated with reduced infectivity (relative infectivity 0.36, 95%  
130 CrI 0.23-0.55). In contrast, high initial antibody levels against the HA head and the HA  
131 stalk were not associated with reduced infectivity (1.33, 95% CrI 0.90-1.90 for the HA  
132 head, 1.08, 95% CrI 0.75-1.59 for the HA stalk)(Figure 3b). The probability of infection  
133 from the community was estimated to be 5.8% per month (95% CrI 2.7%-10.8%).

134

135

## 136 **Necessity of robust antibody responses to reduce susceptibility**

137           Because antibodies against all three antigens were associated with reduced  
138 susceptibility, we next explored whether high antibody levels against a single antigen  
139 could significantly impact susceptibility and infectivity, or whether a combination of  
140 immune responses was needed. We therefore compared the A/H3N2 susceptibility and  
141 infectivity of individuals who had high antibody levels for zero antibody measures, one  
142 antibody measure, two antibody measures where none are against NA, and two or more  
143 antibody measures where one is against NA. This model allows us to test the  
144 hypothesis of an additive protective effect of anti-HA head, anti-HA stalk and anti-NA  
145 antibodies made in our baseline model, as well as any dose-response pattern observed  
146 in the relationship between antibody levels and susceptibility/infectivity. Furthermore, by  
147 splitting the high-responder categories by those with anti-NA antibodies and those with  
148 low-to-undetectable anti-NA antibodies, we are able to further test whether anti-NA  
149 immunity is uniquely associated with reduced infectivity in influenza virus A/H3N2.  
150 Individuals with higher antibody levels for one measure did not see their susceptibility or  
151 infectivity modified compared to individuals with low antibody levels for all measures  
152 (relative susceptibility 0.83, 95% CrI 0.49-1.38; relative infectivity 0.95, 95% CrI 0.56-  
153 1.52), nor did individuals with higher antibody levels for both the anti-HA measures  
154 (relative susceptibility 0.62, 95% CrI 0.34-1.10; relative infectivity 1.17, 95% CrI 0.62-  
155 2.03). However, individuals with high antibody levels for two or more measures, one of  
156 which is a response against NA, demonstrate reduced susceptibility to and infectivity of  
157 influenza virus A/H3N2 (relative susceptibility 0.32, 95% CrI 0.21-0.48; relative  
158 infectivity 0.46, 95% CrI 0.29-0.70)(Figure 4).

## 159 **Effect of anti-NA antibodies in individuals with existing anti-HA antibodies**

160 Finally, we asked whether the benefit of anti-NA immunity was only seen in those  
161 with little-to-no anti-HA immunity, or whether anti-NA immunity was beneficial even in  
162 individuals with high pre-existing antibody levels to HA. To do this, we investigated the  
163 relative contribution of anti-NA antibody levels on influenza virus A/H3N2 infections  
164 among individuals who have existing high anti-HA antibodies to understand what, if any,  
165 benefit that high anti-NA antibodies have on susceptibility and infectivity among  
166 individuals who already have some anti-HA immunity. Among individuals with high anti-  
167 HA head and/or anti-HA stalk preexisting antibodies, those who also had higher anti-NA  
168 antibody levels had reduced susceptibility (relative susceptibility 0.43, 95% CrI 0.30-  
169 0.61) and infectivity (relative infectivity 0.42, 95% CrI 0.27-0.67) to influenza A/H3N2  
170 virus infection, relative to those with low anti-NA antibody levels.

171

## 172 **Simulation analyses**

173 Simulating epidemics in households from the model, we found that the  
174 transmission model was able to capture the observed patterns of secondary attack rates  
175 (SARs) by household size, even among large households (Supplemental Figure 1). In  
176 households of size 4, the most common household size in this study, the observed SAR  
177 was 0.18, and the estimated SAR across 100 simulations was 0.19 (95% CrI 0.14-0.26).

178 When we used our inference framework on data simulated from our model with  
179 known parameter values, parameter values were recovered consistently and with little  
180 directional bias. The simulation value fell within the 95% credible interval in 85%+ of  
181 simulations for all parameters, except for the NA infectivity parameter (70%) (Figure 5).

182 In sensitivity analyses, we checked that the association between higher anti-NA

183 antibody levels and reduced infectivity remains under different assumptions about  
184 distribution of the incubation and infectivity periods (Supplemental Table 1).

## 185 **Discussion**

186 Through intensive monitoring of households with known influenza A/H3N2 virus  
187 infection in combination with statistical transmission modeling, this study was able to  
188 reconstruct household transmission chains and assess the impact of individual-level  
189 factors, such as pre-existing antibody levels, on the susceptibility and infectivity of  
190 influenza A/H3N2 virus in a household setting.

191 Individuals who were infected with influenza A/H3N2 virus and who had high pre-  
192 existing antibodies against NA demonstrated reduced infectivity relative to infected  
193 individuals with low preexisting antibodies against NA. The magnitude of this difference  
194 is substantial, with high-anti-NA individuals having 64% (95% CrI 40-79%) reduced  
195 infectivity compared to low-anti-NA individuals. Importantly, preexisting antibodies  
196 against the HA head and HA stalk were not associated with reduced infectivity,  
197 indicating that a reduction in influenza infectivity may depend on anti-NA responses  
198 alone. This specificity is biologically plausible, as NA, not HA, is responsible for viral  
199 egress, and thus it is reasonable that anti-NA responses alone contribute to a reduction  
200 in overall viral load, viral shedding, and subsequent transmission<sup>16</sup>.

201 We found that all the factors of interest included in the transmission model,  
202 namely age and pre-existing antibody levels against the HA head, HA stalk, and NA,  
203 were associated with influenza susceptibility. Specifically, children aged 14 years and  
204 younger were 63% more susceptible to infection than adults aged 15 years and older.  
205 This is in line with a large body of work indicating that children are more susceptible to  
206 influenza virus infection but suggests that this susceptibility is not entirely due to a lack



207 of influenza exposure history and immune response, as we observe a large association  
208 between age and susceptibility even when accounting for anti-HA head, anti-HA stalk,  
209 and anti-NA antibody levels<sup>22,24–28</sup>. Individuals with high preexisting antibodies  
210 demonstrated reduced susceptibility to influenza A/H3N2 virus infection, with reductions  
211 of 33%, 41%, and 44%, respectively, for antibodies against the HA head, HA stalk, and  
212 NA, which is in line with previous work on the correlates of protection against influenza  
213 viruses, including influenza A/H3N2<sup>12,13,29,30</sup>.

214 We found that susceptibility to and the infectivity of influenza A/H3N2 virus was  
215 not reduced when individuals had higher antibodies for only one target (HA head, HA  
216 stalk, or NA), nor were they reduced when individuals had higher antibodies for multiple  
217 HA targets but not NA. However, having higher antibodies for two or more targets, with  
218 one being NA, was associated with a 68% (52%-79%) reduction in susceptibility and  
219 54% (30%-71%) reduction in infectivity, respectively, compared to individuals with low-  
220 to-undetectable antibodies against all targets. These findings emphasize the importance  
221 of generating robust, multi-epitope immune responses in vaccine-development efforts to  
222 generate vaccinations that protect adequately against infection and transmission. They  
223 also suggest that the induction of robust anti-NA immunity may be especially important.

224 Among individuals with existing immunity to HA, high anti-NA antibody levels are  
225 associated with a reduction in influenza A/H3N2 virus infectivity and susceptibility,  
226 indicating that the induction of better anti-NA response may be beneficial even in  
227 individuals with strong anti-HA immunity. Though current-generation influenza vaccines  
228 typically include a neuraminidase component, the immunogenicity of the NA component  
229 of vaccines is inconsistent, and anti-NA responses are often not utilized as an endpoint

230 in the projection of vaccine efficacy against seasonal influenza<sup>5,31</sup>. These results  
231 suggest that, to generate next-generation influenza vaccines that are effective at  
232 reducing susceptibility as well as infectivity, the anti-NA response generated by vaccine  
233 candidates needs to be emphasized, measured, and assessed.

234         The secondary attack rate (the proportion of household contacts that become  
235 infected) in the study population was 22.3%, which is consistent with that found from  
236 other studies, especially given that there is a large proportion of children who have been  
237 associated with higher influenza SARs, in this population relative to that of other  
238 studies<sup>28,32</sup>. As expected, individuals who remained negative for influenza A/H3N2 virus  
239 throughout the monitoring period had higher initial levels for antibodies against the HA  
240 head, HA stalk, and NA when compared to individuals who became positive. Index  
241 cases had a similar distribution of pre-existing antibody levels compared to secondary  
242 cases for anti-HA head and stalk antibodies, indicating that there is likely not a large bias  
243 in the ascertainment of index cases vs. secondary cases relative to preexisting antibody  
244 levels. The small difference in distribution observed for NA may be due to differing age  
245 and symptom distributions between index cases and secondary cases.

246         This study is strengthened by the relatively large sample size, robust  
247 immunologic characterization of participants before and after infection, and methods  
248 that allow for probabilistic chains of transmission to be reconstructed to assess  
249 individual-level risk factors for infectivity and susceptibility, rather than assuming all  
250 secondary cases arise from the index case. Furthermore, the unvaccinated nature of  
251 the population allows us to specifically examine infection-induced immunity.

252           This study is limited by the low number of vaccinated participants, which makes  
253 stratification by vaccination status impossible; the relative contribution of anti-NA  
254 antibodies on A/H3N2 transmission may differ between vaccine-induced and infection-  
255 induced immunity in ways that we cannot assess. Furthermore, even though our  
256 modelling accounts for the possibility of community infections, we cannot rule out the  
257 possibility that some household contacts infected in the community might have been  
258 misattributed to in-household transmission; however, we would not expect this to be  
259 specific to higher or low-to-undetectable antibody levels for any of the targets and would  
260 not expect a directional bias in these estimates.

## 261 **Conclusions**

262           Using data from two large household transmission studies, we found that, though  
263 pre-existing anti-HA head, stalk, and anti-NA antibodies are important for reduced  
264 susceptibility to influenza A/H3N2 virus infection, only anti-NA antibodies are associated  
265 with reduced infectivity in a household transmission setting. Our results suggest that the  
266 induction of a better humoral immune response against NA may improve next-  
267 generation vaccines' effectiveness at preventing infection and disease and may reduce  
268 individual infectivity even in the event of a breakthrough infection. These findings  
269 reinforce the need for continued development of influenza vaccinations that target NA in  
270 addition to HA in order to develop next-generation influenza vaccines that protect  
271 against influenza virus infection and reduce influenza infectivity.

272

273

274

275

## 276 **Online Methods**

### 277 **Study Population and Design**

278           This study uses data from two household influenza transmission studies based in  
279 Managua, Nicaragua: the Household Influenza Transmission Study (HITS) and the  
280 Household Influenza Cohort Study (HICS). HITS is a case-ascertained study, meaning  
281 that influenza-positive individuals are identified, and other members of their household  
282 recruited for enrollment, that ran from 2012 to 2017, and HICS is a prospective  
283 household-based cohort study that began in 2017 and is currently ongoing. In both  
284 studies, influenza A/H3N2 virus-positive individuals, the index cases, are initially  
285 detected at a health center, where household members are enrolled (HITS) or activated  
286 (HICS) into intensive monitoring for a period of ~14 days. During this period, household  
287 members are tested repeatedly for influenza virus, allowing for a reconstruction of likely  
288 transmission chains within each household. Blood samples are collected both at the  
289 beginning of the monitoring period and 30-45 days after<sup>33</sup>. These studies were approved  
290 by the institutional review boards at the Nicaraguan Ministry of Health and the University  
291 of Michigan and are in accordance with the Helsinki Declaration of the World Medical  
292 Association. Written consent to participate or parental permission was obtained for all  
293 participants; in children older than 6 years, verbal assent was obtained.

### 294 **Laboratory Methods**

295 Nasal/oropharyngeal swabs collected from household members were tested for  
296 influenza virus with real-time reverse-transcription polymerase chain reaction (RT-PCR)  
297 using validated Centers for Disease Control and Prevention (CDC) protocols. If positive  
298 for influenza virus, subtype or lineage determination was performed using additional RT-  
299 PCR assays<sup>34-36</sup>. Several serological assays were conducted on each blood sample to

300 measure the initial and final antibody levels against various influenza antigens;  
301 hemagglutination inhibition assays (HAIs), and enzyme-linked immunosorbent assays  
302 (ELISAs) against full-length HA, the HA stalk, and NA. Details about the specific  
303 antigens used for each assay are available in the supplement (Supplemental Table 2).

#### 304 **Statistical Methods**

305 Preexisting antibody levels were divided into quartiles, with the lowest quartile  
306 corresponding to low antibody levels and the remaining quartiles corresponding to high  
307 antibody levels. The distribution of initial antibody levels for index cases, secondary  
308 infections within the household of the index case, and uninfected household members  
309 were compared using two-sided Wilcoxon rank-sum tests.

310 We used a mathematical model to assess the impact of individual-level age and  
311 immune characteristics and contact structure on the person-to-person probability of  
312 transmission. The model estimated the risk of transmission between all household  
313 members including the risk from secondary cases. The risk of transmission from an  
314 infected individual depended on time after infection with by lognormal distribution<sup>23,37,38</sup>.  
315 This risk was modulated by infectivity factors, namely individual pre-existing anti-HA  
316 head, anti-HA stalk, and anti-NA antibody levels of the infector. It was also modulated  
317 by the susceptibility factors being the individual characteristics of the susceptible  
318 contact, namely individual age and pre-existing anti-HA head, anti-HA stalk, and anti-NA  
319 levels. Finally the risk depended on the household size. We also estimated the risk of  
320 infection from the community. This transmission model accounts for chains of  
321 transmission within households, namely that additional household infections beyond the  
322 index case may occur due to community transmission or due to infection from a non-  
323 index household member, which is advantageous relative to other common statistical

324 approaches to transmission, approaches including logistic models<sup>23,24,39,40</sup>. Additional  
325 information about the transmission model, including the functional forms and  
326 mathematical formalism, are included in the Supplement.

327 Model parameters were estimated using Bayesian Markov chain Monte Carlo  
328 (MCMC)<sup>23,41</sup>. The statistical model has a hierarchical structure with three levels<sup>23</sup>: i) the  
329 observation level ensures consistency between observed and augmented data (based  
330 on the probabilistic distribution assumed for the incubation period<sup>23,41-43</sup>), ii) the  
331 transmission model (described above), characterizes within household transmission  
332 dynamics, iii) the prior model describe prior distribution for model parameters.  
333 Transmission parameters and augmented times of infection were iteratively updated  
334 using a Metropolis-Hastings algorithm<sup>23,41-45</sup>. Each MCMC chain was iterated 50,000  
335 times, and the first 500 iterations were burned out. We report the median of the  
336 posterior distribution with the 95 credible interval (CrI) for each estimated transmission  
337 parameter.

338 Additionally, 100 datasets of simulated infection events were generated by an  
339 agent-based model by retaining household structure, index case assignment, and  
340 individual characteristics such as age and antibody levels. Infection events at each time  
341 step were drawn randomly from the probability of transmission derived from the  
342 transmission model. Transmission parameters used were the posterior medians. We  
343 assessed model adequacy by comparing secondary attack rates at each household size  
344 generated by the model to those generated by the observed data, and examined the  
345 bias of estimated parameters, including the proportion of the 95% credible interval from  
346 the original posterior distributions that covered the median simulation values. Analyses

347 were conducted using SAS 9.4, R version 4.3.1-4.3.2, and Visual Studio Code version

348 1.87.2

349

350

351

352

353

354

355

356

357

358

359

360

361

362

363

364

365

366

367

368

369

370

371

372

373

374

375 **Tables**

376 **Table 1. Description of Study Population**

|                                 | <b>A/H3N2 positive<br/>(n=319)<br/>n (%)</b> | <b>A/H3N2 negative<br/>(n=516)<br/>n (%)</b> | <b>Total (n=835)<br/>n (%)</b> |
|---------------------------------|----------------------------------------------|----------------------------------------------|--------------------------------|
| <b>Gender</b>                   |                                              |                                              |                                |
| <b>Female</b>                   | 176 (55.2)                                   | 342 (66.3)                                   | 518 (62.0)                     |
| <b>Male</b>                     | 143 (44.8)                                   | 174 (33.7)                                   | 317 (38.0)                     |
| <b>Age (mean, SD)</b>           | 14.7 (14.9)                                  | 27.1 (19.0)                                  | 22.3 (18.6)                    |
| <b>0-1 year</b>                 | 27 (8.5)                                     | 9 (1.7)                                      | 36 (4.3)                       |
| <b>2-4 years</b>                | 66 (20.7)                                    | 32 (6.2)                                     | 98 (11.7)                      |
| <b>5-14 years</b>               | 120 (37.6)                                   | 147 (28.5)                                   | 267 (32.0)                     |
| <b>15+ years</b>                | 106 (33.2)                                   | 328 (63.6)                                   | 434 (52.0)                     |
| <b>Vaccination</b>              |                                              |                                              |                                |
| <b>Ever vaccinated</b>          | 40 (12.5)                                    | 36 (7.0)                                     | 76 (9.1)                       |
| <b>Recently<br/>Vaccinated*</b> | 2 (0.6)                                      | 0 (0.0)                                      | 2 (0.2)                        |
| <b>Season</b>                   |                                              |                                              |                                |
| <b>2014-2015</b>                | 44 (13.8)                                    | 90 (17.4)                                    | 134 (16.0)                     |
| <b>2016-2017</b>                | 122 (38.2)                                   | 164 (31.8)                                   | 286 (34.3)                     |
| <b>2017-2018</b>                | 153 (48.0)                                   | 262 (50.8)                                   | 415 (49.7)                     |
| <b>HAI</b>                      |                                              |                                              |                                |
| <b>Quartile 1</b>               | 122 (38.2)                                   | 143 (27.7)                                   | 265 (31.7)                     |



377

|                   |            |            |            |
|-------------------|------------|------------|------------|
| <b>Quartile 2</b> | 74 (23.2)  | 107 (20.7) | 181 (21.7) |
| <b>Quartile 3</b> | 92 (28.8)  | 171 (33.1) | 263 (31.5) |
| <b>Quartile 4</b> | 31 (9.7)   | 95 (18.4)  | 126 (15.1) |
| <b>HA stalk</b>   |            |            |            |
| <b>Quartile 1</b> | 117 (36.7) | 91 (17.6)  | 208 (24.9) |
| <b>Quartile 2</b> | 89 (27.9)  | 123 (23.8) | 212 (25.4) |
| <b>Quartile 3</b> | 61 (19.1)  | 142 (27.5) | 203 (24.3) |
| <b>Quartile 4</b> | 52 (16.3)  | 160 (31.0) | 212 (25.4) |
| <b>NA</b>         |            |            |            |
| <b>Quartile 1</b> | 128 (40.1) | 83 (16.1)  | 211 (25.3) |
| <b>Quartile 2</b> | 79 (24.8)  | 130 (25.2) | 209 (25.0) |
| <b>Quartile 3</b> | 64 (20.1)  | 144 (27.9) | 208 (24.9) |
| <b>Quartile 4</b> | 48 (15.1)  | 159 (30.8) | 207 (24.8) |

378 \*Vaccinated within 6 months of the start of the intensive monitoring period.

379

380

381

382

### 383 Figures

384

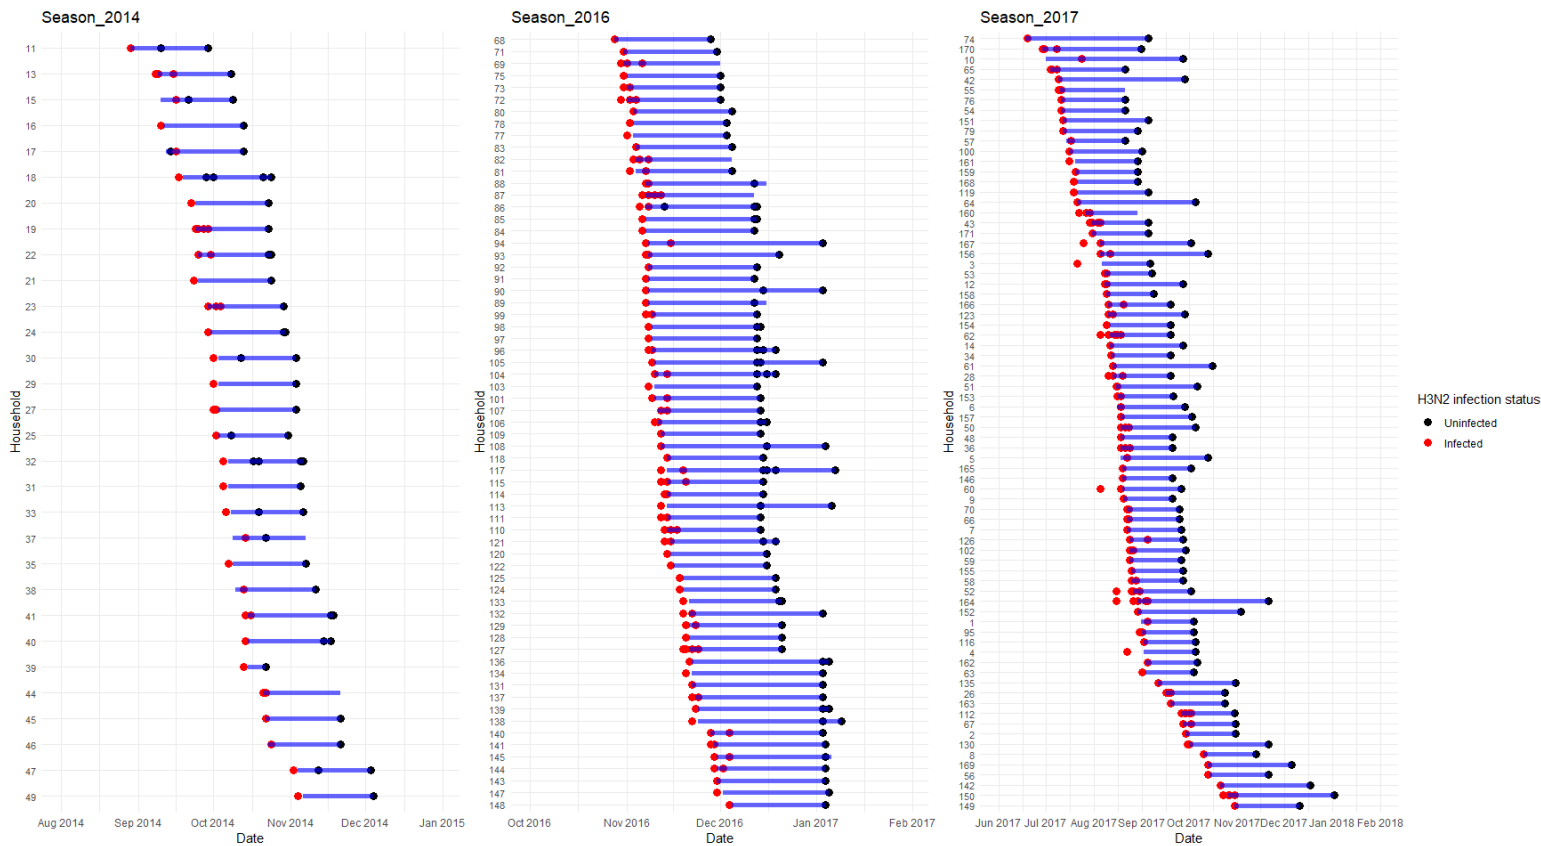

**Figure 1. Intensive monitoring periods by household.** Infected individuals represented with red dots; uninfected individuals are represented in blue dots. The blue bars represent the duration of the influenza intensive monitoring period within the household.

385

386

387

388

389

390

391

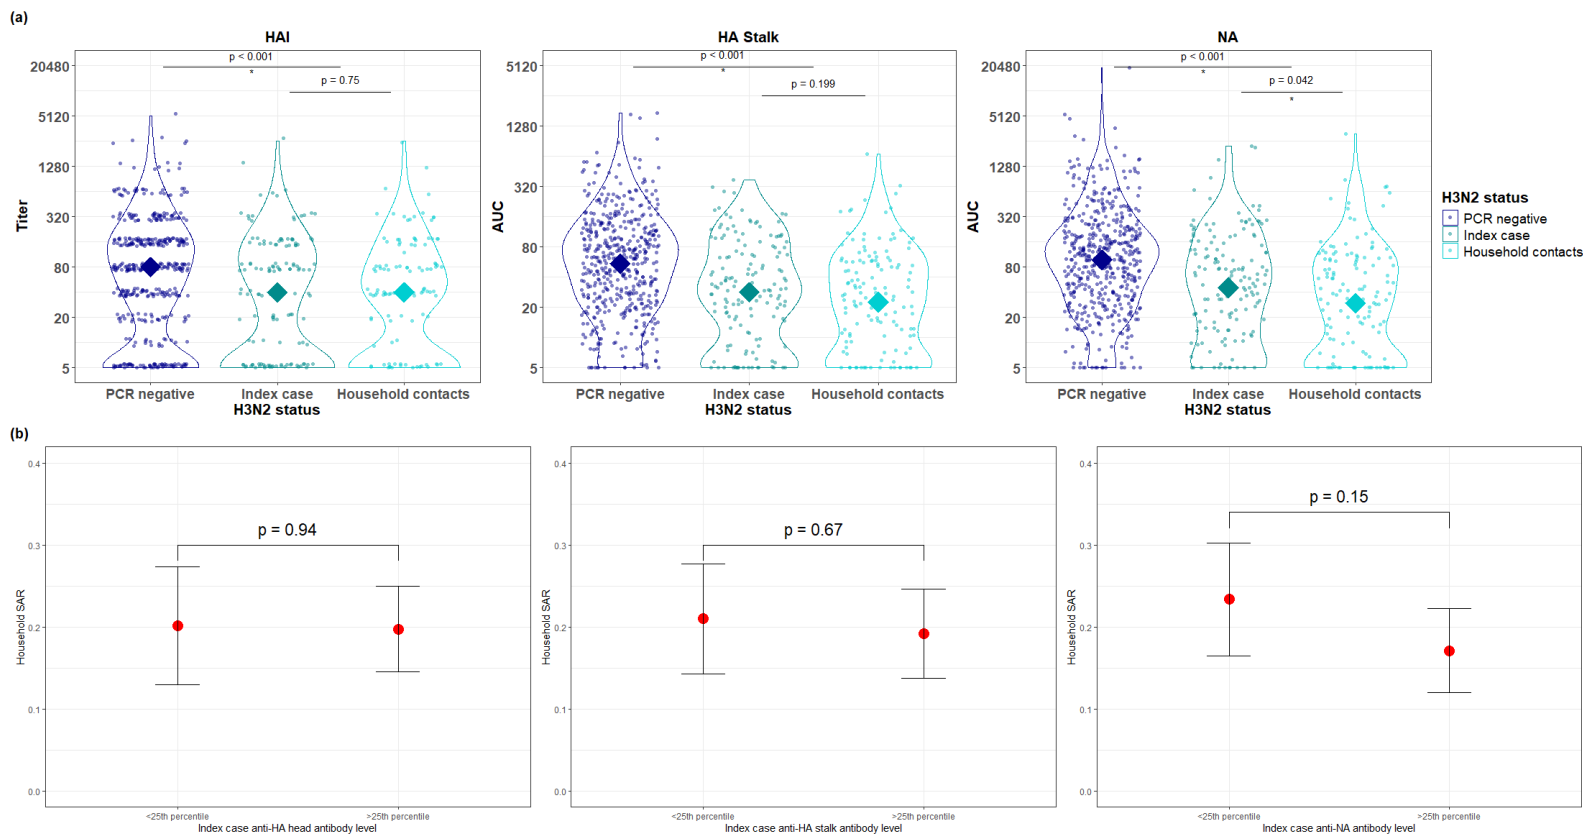

392

393

394

**Figure 2. Antibody levels by PCR status and household SAR.** (a) Distribution of pre-infection antibody titers by PCR-negative individuals, probable index cases, and probable secondary/tertiary cases (chevrons representing mean antibody level). (b) Mean and 95% confidence intervals for the secondary attack rates by household, stratified by the antibody levels of the household index case. P-values are calculated from generalized estimating equations (GEEs) with weighting by household size.

395

396

397

398

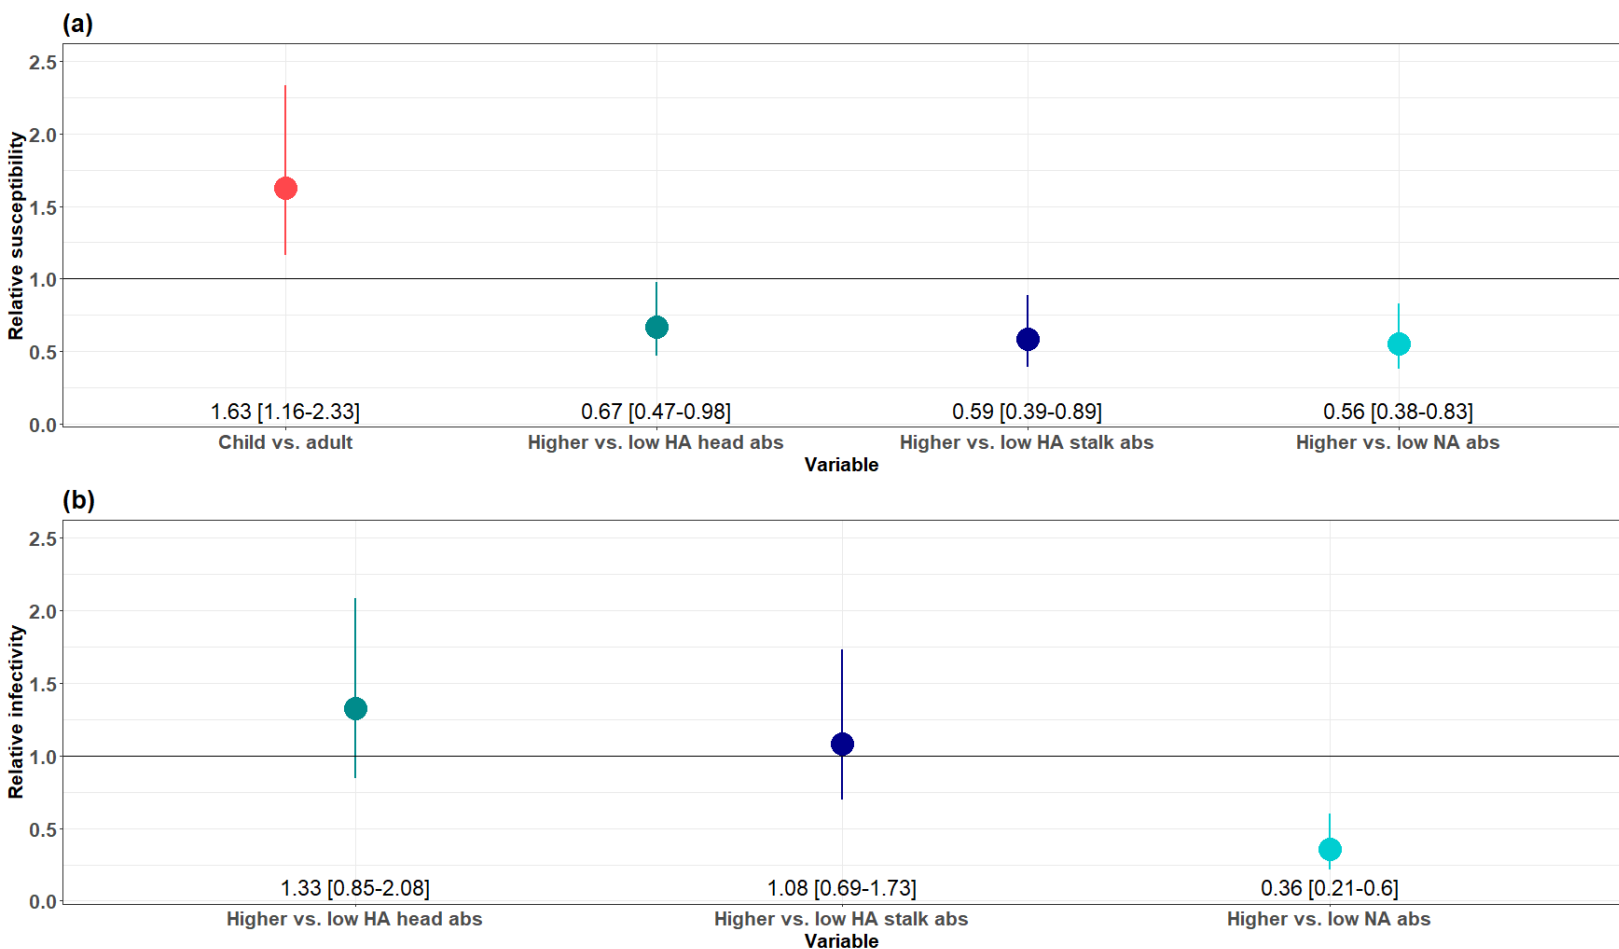

**Figure 3. Relative susceptibility and infectivity of A/H3N2 by age and antibody levels** (a) Point estimate and 95% credible interval for relative susceptibility to A/H3N2 as a function of age and high versus low initial antibody levels against the HA head, HA stalk, and NA. (b) Point estimate and 95% credible interval for relative infectivity of A/H3N2 as a function of high versus low initial antibody levels against the HA head, HA stalk, and NA.

399  
400  
401  
402  
403

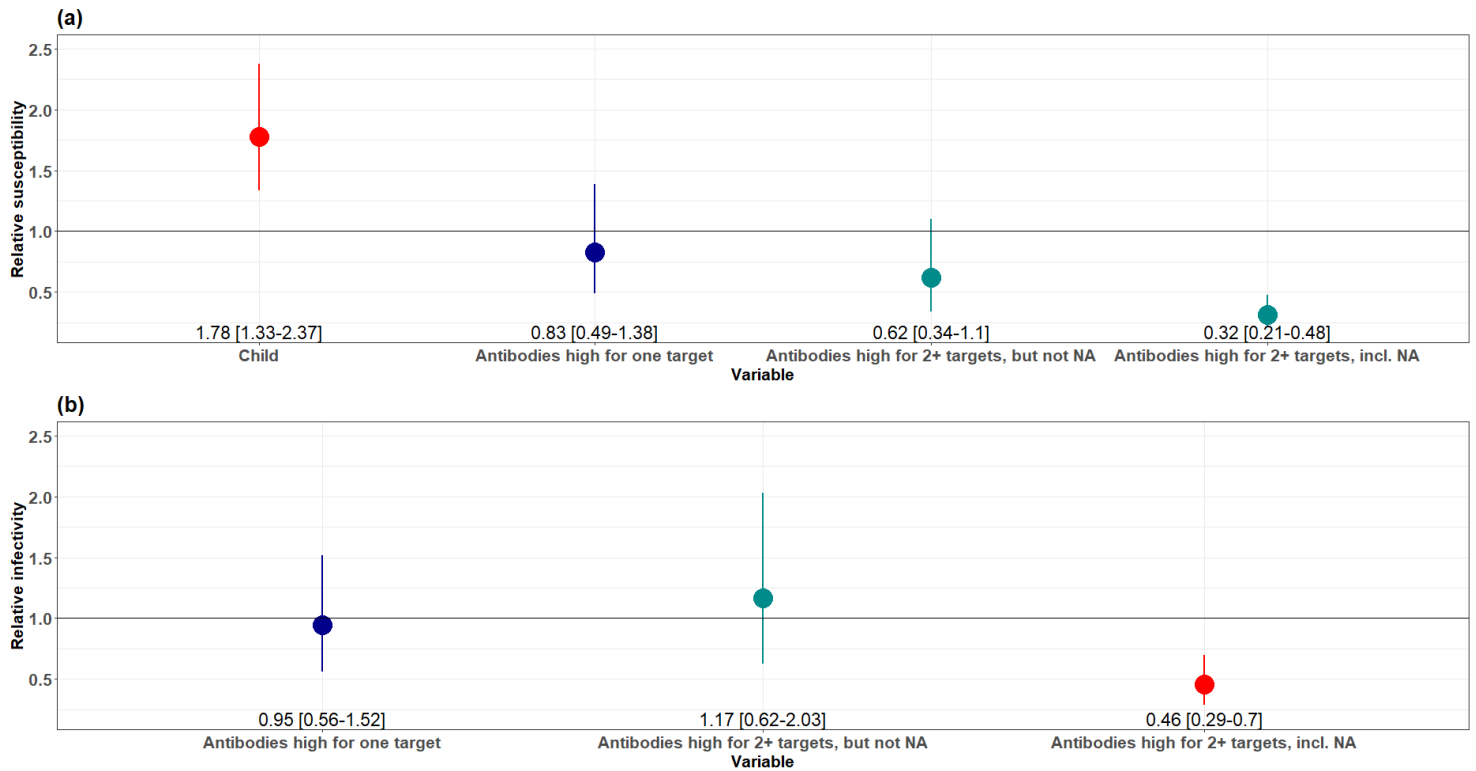

404

**Figure 4. Effect of cumulative antibody levels on susceptibility and infectivity** Point estimate and 95% credible interval for (a) relative susceptibility to A/H3N2 as a function of age and categorical higher-versus-low antibody levels for zero (reference), one, two or more (not including NA), or two or more (including NA) antibody targets, and (b) relative infectivity of A/H3N2 as a function of categorical, higher-versus-low antibody levels for zero (reference), one, two or more (not including NA), or two or more (including NA) antibody targets.

405

406

407

408

409

410

411

412

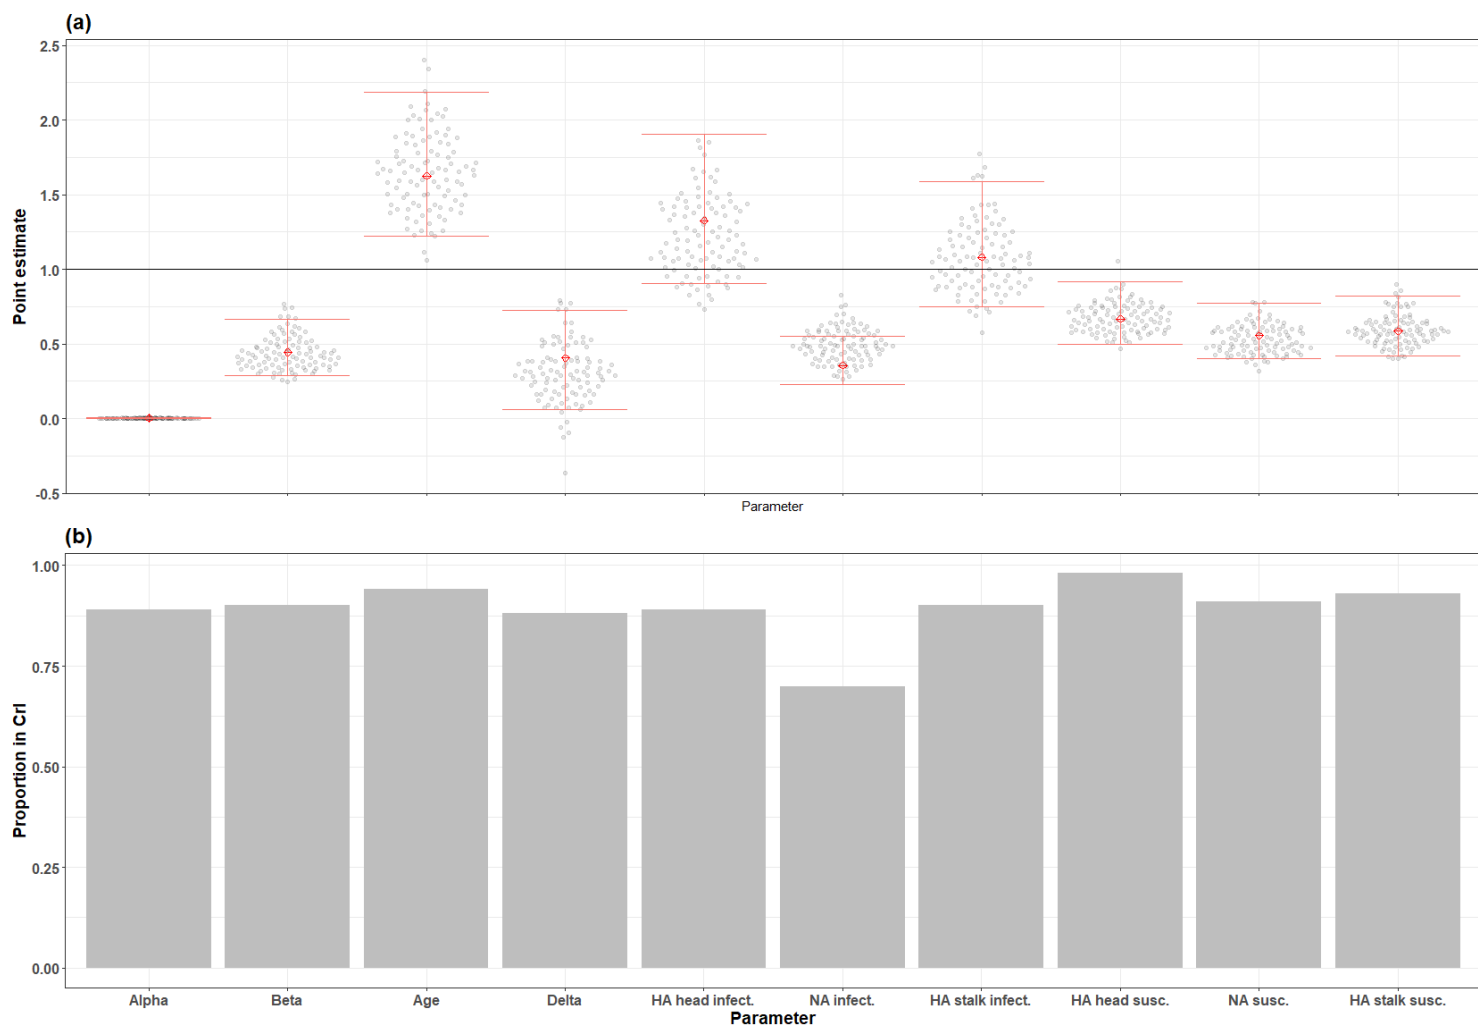

413

414

**Figure 5. Parameter estimates in simulated datasets.** (a) Point estimate and 95% credible interval for each parameter from the actual data, compared to the parameter point estimates recovered from running the MCMC on each simulated dataset. (b) proportion of simulations where the parameter point estimates recovered from the simulated dataset falls within the 95% credible interval of the parameters run on the actual data. Alpha is the community transmission parameter, beta is the household transmission parameter, and delta is a parameter for relating beta to household size.

415

416

417

418

## 419 **Acknowledgements**

420 This work was supported by the National Institutes of Allergy and Infectious Diseases  
421 through the Collaborative Influenza Vaccine Innovation Centers [75N93019C00051 to  
422 F.K. and A.G.]the St. Jude Center of Influenza Research and Surveillance  
423 [HHSN272201400006C to A.G.]; the St. Jude Center of Excellence for Influenza  
424 Research and Response [75N93021C00016 to A.G.]and grant R01 AI120997 to A.G.  
425 Aubree Gordon is supported by the Biosciences Initiative at the University of Michigan  
426 through a Mid-career Biosciences Faculty Achievement Award (MBioFAR). S.C.  
427 acknowledges support by the European Commission under the EU4Health programme  
428 2021-2027, Grant Agreement - Project: 101102733 — DURABLE, the Laboratoire  
429 d'Excellence Integrative Biology of Emerging Infectious Diseases program (grant ANR-  
430 10-LABX-62-IBEID) the European Union's Horizon 2020 research and innovation  
431 programme under VEO grant agreement No. 874735, and the INCEPTION project  
432 (PIA/ANR16-CONV-0005). The funding agencies had no role in the design and conduct  
433 of the study, collection, management, analysis or interpretation of the data; preparation,  
434 review, or approval of the manuscript; or decision to submit the manuscript for  
435 publication.

436

437 We thank the study participants and the many dedicated study personnel in Nicaragua  
438 at the Centro Nacional de Diagnóstico y Referencia and the Sócrates Flores Vivas  
439 Health Center.

440

## 441 **Author Contributions**

442 Gregory Hoy: Data curation; formal analysis; methodology; software; validation;  
443 visualization; writing—original draft; writing—review and editing. Thomas Cortier: formal  
444 analysis; methodology; software; validation; visualization; writing-original draft; writing-  
445 review and editing. Hannah E. Maier: data curation; methodology; software; validation;  
446 visualization; writing-review and editing. Guillermina Kuan: Investigation; project  
447 administration; writing—review and editing. Roger Lopez: Investigation; writing—review  
448 and editing. Nery Sanchez: Investigation; writing—review and editing. Sergio Ojeda:  
449 Investigation; project administration; writing—review and editing. Miguel Plazaola:  
450 Investigation; project administration; writing—review and editing. Daniel Stadlbauer:  
451 Data curation; writing—review and editing. Abigail Shotwell: data curation; writing-  
452 review and editing. Angel Balmaseda: Investigation; methodology; supervision; project  
453 administration; writing—review and editing. Florian Krammer: funding acquisition;  
454 investigation; ; supervision; writing—review and editing. Simon Cauchemez:  
455 Conceptualization; investigation; methodology; project administration; resources;  
456 supervision; writing—review and editing. Aubree Gordon: Conceptualization; funding  
457 acquisition; investigation; methodology; project administration; resources; supervision;  
458 writing—review and editing.

459

460 **Conflict of interest statement**

461 The Icahn School of Medicine at Mount Sinai has filed patent applications relating to  
462 SARS-CoV-2 serological assays, NDV-based SARS-CoV-2 vaccines influenza virus  
463 vaccines and influenza virus therapeutics which list Florian Krammer as co-inventor.  
464 Mount Sinai has spun out a company, Kantaro, to market serological tests for SARS-CoV-  
465 2 and another company, CastleVax, to develop SARS-CoV-2 vaccines. Florian Krammer  
466 is a co-founder and scientific advisory board member of CastleVax. Florian Krammer has  
467 consulted for Merck, Curevac, Seqirus, GSK and Pfizer and is currently consulting for 3rd  
468 Rock Ventures, Gritstone and Avimex. The Krammer laboratory is collaborating with  
469 Dynavax on influenza vaccine development. Aubree Gordon has served on an RSV  
470 vaccine advisory board for Janssen.

471 **Inclusion and ethics in global research statement**

472 This study has included local researchers throughout the research process and is locally  
473 relevant as determined in partnership with local partners. Roles and responsibilities were  
474 agreed upon amongst collaborators ahead of the research, including capacity building for  
475 local researchers. This research was approved by the Nicaraguan Ministry of Health.

476

477 **Data availability statement**

478

479 The data that support the findings of this study are available from the corresponding  
480 author upon reasonable request and following IRB approval.

481

482 **Code availability statement**

483 Code supporting the findings of this research can be found at  
484 [https://github.com/gehoy/H3N2\\_NA\\_transmission](https://github.com/gehoy/H3N2_NA_transmission).

485

486

487

488

489

490

491



492

## 493 **References**

494

495 1. WHO launches new global influenza strategy. [https://www.who.int/news/item/11-](https://www.who.int/news/item/11-03-2019-who-launches-new-global-influenza-strategy)  
496 03-2019-who-launches-new-global-influenza-strategy.

497 2. Belongia, E. A. *et al.* Variable influenza vaccine effectiveness by subtype: a  
498 systematic review and meta-analysis of test-negative design studies. *Lancet Infect Dis*  
499 **16**, 942–951 (2016).

500 3. Berlanda Scorza, F., Tsvetnitsky, V. & Donnelly, J. J. Universal influenza  
501 vaccines: Shifting to better vaccines. *Vaccine* **34**, 2926–2933 (2016).

502 4. Doherty, P. C. & Kelso, A. Toward a broadly protective influenza vaccine. *J Clin*  
503 *Invest* **118**, (2008).

504 5. Krammer, F. *et al.* NAction! How Can Neuraminidase-Based Immunity Contribute  
505 to Better Influenza Virus Vaccines? *mBio* **9**, e02332-17 (2018).

506 6. Nachbagauer, R. *et al.* A universal influenza virus vaccine candidate confers  
507 protection against pandemic H1N1 infection in preclinical ferret studies. *npj Vaccines* **2**,  
508 1–13 (2017).

509 7. Past Seasons Vaccine Effectiveness Estimates | CDC.  
510 <https://www.cdc.gov/flu/vaccines-work/past-seasons-estimates.html> (2022).

511 8. Paules, C. I., Marston, H. D., Eisinger, R. W., Baltimore, D. & Fauci, A. S. The  
512 Pathway to a Universal Influenza Vaccine. *Immunity* **47**, 599–603 (2017).

513 9. Nichol, K. L. Efficacy and effectiveness of influenza vaccination. *Vaccine* **26**,  
514 D17–D22 (2008).

515 10. Jackson, C., Vynnycky, E., Hawker, J., Olowokure, B. & Mangtani, P. School  
516 closures and influenza: systematic review of epidemiological studies. *BMJ Open* **3**,  
517 e002149 (2013).

518 11. Jordan, R. *et al.* Universal vaccination of children against influenza: are there  
519 indirect benefits to the community? A systematic review of the evidence. *Vaccine* **24**,  
520 1047–1062 (2006).

521 12. Monto, Arnold S. & Kendal, Alan P. EFFECT OF NEURAMINIDASE ANTIBODY  
522 ON HONG KONG INFLUENZA. *The Lancet* **301**, 623–625 (1973).

523 13. Monto, A. S. *et al.* Antibody to Influenza Virus Neuraminidase: An Independent  
524 Correlate of Protection. *The Journal of Infectious Diseases* **212**, 1191–1199 (2015).

- 525 14. Giurgea, L. T., Morens, D. M., Taubenberger, J. K. & Memoli, M. J. Influenza  
526 Neuraminidase: A Neglected Protein and Its Potential for a Better Influenza Vaccine.  
527 *Vaccines (Basel)* **8**, 409 (2020).
- 528 15. Maier, H. E. *et al.* Pre-existing Antineuraminidase Antibodies Are Associated  
529 With Shortened Duration of Influenza A(H1N1)pdm Virus Shedding and Illness in  
530 Naturally Infected Adults. *Clinical Infectious Diseases* **70**, 2290–2297 (2020).
- 531 16. Bouvier, N. M. & Palese, P. THE BIOLOGY OF INFLUENZA VIRUSES. *Vaccine*  
532 **26**, D49–D53 (2008).
- 533 17. McMahon, M. *et al.* Immunity induced by vaccination with recombinant influenza  
534 B virus neuraminidase protein breaks viral transmission chains in guinea pigs in an  
535 exposure intensity-dependent manner. *J Virol* **97**, e0105723 (2023).
- 536 18. Tan, J. *et al.* Murine Broadly Reactive Antineuraminidase Monoclonal Antibodies  
537 Protect Mice from Recent Influenza B Virus Isolates and Partially Inhibit Virus  
538 Transmission in the Guinea Pig Model. *mSphere* **7**, e0092721 (2022).
- 539 19. Tan, J. *et al.* Human Anti-neuraminidase Antibodies Reduce Airborne  
540 Transmission of Clinical Influenza Virus Isolates in the Guinea Pig Model. *J Virol* **96**,  
541 e0142121 (2022).
- 542 20. Romagosa, A. *et al.* Vaccination of influenza a virus decreases transmission  
543 rates in pigs. *Vet Res* **42**, 120 (2011).
- 544 21. McMahon, M. *et al.* Mucosal Immunity against Neuraminidase Prevents Influenza  
545 B Virus Transmission in Guinea Pigs. *mBio* **10**, e00560-19 (2019).
- 546 22. Tsang, T. K. *et al.* Individual Correlates of Infectivity of Influenza A Virus  
547 Infections in Households. *PLOS ONE* **11**, e0154418 (2016).
- 548 23. Cauchemez, S., Carrat, F., Viboud, C., Valleron, A. J. & Boëlle, P. Y. A Bayesian  
549 MCMC approach to study transmission of influenza: application to household  
550 longitudinal data. *Stat Med* **23**, 3469–3487 (2004).
- 551 24. Tsang, T. K. *et al.* Influenza A Virus Shedding and Infectivity in Households. *J*  
552 *Infect Dis* **212**, 1420–1428 (2015).
- 553 25. Nayak, J., Hoy, G. & Gordon, A. Influenza in Children. *Cold Spring Harb*  
554 *Perspect Med* a038430 (2019) doi:10.1101/cshperspect.a038430.
- 555 26. Cauchemez, S. *et al.* Determinants of Influenza Transmission in South East Asia:  
556 Insights from a Household Cohort Study in Vietnam. *PLOS Pathogens* **10**, e1004310  
557 (2014).
- 558 27. Mettelman, R. C. & Thomas, P. G. Human Susceptibility to Influenza Infection  
559 and Severe Disease. *Cold Spring Harb Perspect Med* **11**, a038711 (2021).

- 560 28. Huang, Q. S. *et al.* Risk Factors and Attack Rates of Seasonal Influenza  
561 Infection: Results of the Southern Hemisphere Influenza and Vaccine Effectiveness  
562 Research and Surveillance (SHIVERS) Seroepidemiologic Cohort Study. *J Infect Dis*  
563 **219**, 347–357 (2019).
- 564 29. Hobson, D., Curry, R. L., Beare, A. S. & Ward-Gardner, A. The role of serum  
565 haemagglutination-inhibiting antibody in protection against challenge infection with  
566 influenza A2 and B viruses. *Epidemiology & Infection* **70**, 767–777 (1972).
- 567 30. Ng, S. *et al.* Novel correlates of protection against pandemic H1N1 influenza A  
568 virus infection. *Nat Med* **25**, 962–967 (2019).
- 569 31. Weir, J. P. & Gruber, M. F. An overview of the regulation of influenza vaccines in  
570 the United States. *Influenza and Other Respiratory Viruses* **10**, 354–360 (2016).
- 571 32. Azman, A. S. *et al.* Household transmission of influenza A and B in a school-  
572 based study of non-pharmaceutical interventions. *Epidemics* **5**, 181–186 (2013).
- 573 33. Gordon, A. *et al.* Influenza Transmission Dynamics in Urban Households,  
574 Managua, Nicaragua, 2012–2014. *Emerg Infect Dis* **24**, 1882–1888 (2018).
- 575 34. World Health Organization. WHO manual on animal influenza diagnosis and  
576 surveillance. (2002).
- 577 35. World Health Organization. WHO information for the molecular detection of  
578 influenza viruses. (2020).
- 579 36. Centers for Disease Control and Prevention. CDC Real-time RT-PCR (rRT-PCR)  
580 Protocol for Detection and Characterization of Influenza – Influenza A and Influenza B.
- 581 37. Ghani, A. *et al.* The Early Transmission Dynamics of H1N1pdm Influenza in the  
582 United Kingdom. *PLoS Curr* **1**, RRN1130 (2010).
- 583 38. Carrat, F. *et al.* Time lines of infection and disease in human influenza: a review  
584 of volunteer challenge studies. *Am J Epidemiol* **167**, 775–785 (2008).
- 585 39. Tsang, T. K., Lau, L. L. H., Cauchemez, S. & Cowling, B. J. Household  
586 Transmission of Influenza Virus. *Trends in Microbiology* **24**, 123–133 (2016).
- 587 40. Tsang, T. K. *et al.* Association Between Antibody Titers and Protection Against  
588 Influenza Virus Infection Within Households. *The Journal of Infectious Diseases* **210**,  
589 684–692 (2014).
- 590 41. Cauchemez, S. *et al.* Household Transmission of 2009 Pandemic Influenza A  
591 (H1N1) Virus in the United States. *New England Journal of Medicine* **361**, 2619–2627  
592 (2009).
- 593 42. Nishiura, H. & Inaba, H. Estimation of the incubation period of influenza A (H1N1-  
594 2009) among imported cases: Addressing censoring using outbreak data at the origin of  
595 importation. *Journal of Theoretical Biology* **272**, 123–130 (2011).

- 596 43. Nishiura, H. Early efforts in modeling the incubation period of infectious diseases  
597 with an acute course of illness. *Emerg Themes Epidemiol* **4**, 2 (2007).
- 598 44. Virlogeux, V. *et al.* Estimating the Distribution of the Incubation Periods of Human  
599 Avian Influenza A(H7N9) Virus Infections. *American Journal of Epidemiology* **182**, 723–  
600 729 (2015).
- 601 45. *Markov Chain Monte Carlo in Practice*. (Chapman and Hall/CRC, New York,  
602 1995). doi:10.1201/b14835.
- 603
